# Molecular Characterization and Development of Real-Time PCR Assay for Pine-Wood Nematode *Bursaphelenchus xylophilus* (Nematoda: Parasitaphelenchidae)

Weimin Ye<sup>1\*</sup>, Robin M. Giblin-Davis<sup>2</sup>

**1** Nematode Assay Section, Agronomic Division, North Carolina Department of Agriculture & Consumer Services, Raleigh, North Carolina, United States of America, **2** Fort Lauderdale Research and Education Center, University of Florida/IFAS, Davie, Florida, United States of America

## Abstract

*Bursaphelenchus xylophilus*, the pine-wood nematode (PWN), is the causal agent of pine wilt disease, one of the most damaging emerging pest problems to forests around the world. It is native to North America where it causes relatively minor damage to native conifers but is labeled an EPPO-A-2 pest and a quarantine nematode for many countries outside of the United States because of its potential for destruction to their native conifers. Exports of wood logs and commodities involving softwood packaging materials now require a lab test for the presence/absence of this regulated nematode species. We characterized the DNA sequences on the ribosomal DNA small subunit, large subunit D2/D3, internal transcribed spacer (ITS) and mitochondrial DNA cytochrome oxidase subunit one on the aphelenchid species and described the development of a real-time-PCR method for rapid and accurate identification of PWN targeting the ITS-1. A total of 97 nematode populations were used to evaluate the specificity and sensitivity of this assay, including 45 populations of *B. xylophilus* and 36 populations of 21 other species of *Bursaphelenchus* which belong to the *abietinus*, *cocophilus*, *eggersi*, *fungivorus*, *hofmanni*, *kevinii*, *leoni*, *sexdentati*, and *xylophilus* groups and one unassigned group from a total of 13 groups in the genus *Bursaphelenchus*; 15 populations of *Aphelenchoides besseyi*, *A. fragariae*, *Aphelenchoides* species and *Aphelenchus avenae*; and one population of mixed nematode species from a soil sample. This assay proved to be specific to *B. xylophilus* only and was sensitive to a single nematode specimen regardless of the life stages present. This approach provides rapid species identification necessary to comply with the zero-tolerance export regulations.

**Citation:** Ye W, Giblin-Davis RM (2013) Molecular Characterization and Development of Real-Time PCR Assay for Pine-Wood Nematode *Bursaphelenchus xylophilus* (Nematoda: Parasitaphelenchidae). PLoS ONE 8(11): e78804. doi:10.1371/journal.pone.0078804

**Editor:** Baochuan Lin, Naval Research Laboratory, United States of America

**Received:** June 14, 2013; **Accepted:** September 17, 2013; **Published:** November 11, 2013

This is an open-access article, free of all copyright, and may be freely reproduced, distributed, transmitted, modified, built upon, or otherwise used by anyone for any lawful purpose. The work is made available under the Creative Commons CC0 public domain dedication.

**Funding:** This work was supported by the North Carolina Tobacco Trust Fund Commission (Grant Number: 2011-029-13). It was initially supported by the United States Department of Defense and USDA/APHIS/PPQ (Project numbers: 10-8100-1587-CA and 11-8100-1621-CA) on a separate project which set the stage for the research leading to the development of this publication. The funders had no role in study design, data collection and analysis, decision to publish, or preparation of the manuscript. Any opinion, finding conclusion or recommendations expressed in this publication are those of the author(s) and do not necessarily reflect the view and policies of the North Carolina Tobacco Trust Fund Commission.

**Competing Interests:** The authors have declared that no competing interests exist.

\* E-mail: weimin.ye@ncagr.gov

## Introduction

The pine-wood nematode (PWN), *Bursaphelenchus xylophilus* (Steiner & Buhner, 1934) Nickle, 1970 (= *B. lignicolus* Mamiya & Kiyohara, 1972), first recorded and described in Louisiana as *Aphelenchoides xylophilus* [1], is native to North America (USA, Canada and Mexico) [2,3] and is a serious invasive and destructive species to coniferous forests in countries where it has been introduced. This nematode has been considered the causal agent for pine wilt disease since 1971 [4] being transmitted from tree to tree by wood-inhabiting longhorn beetles that belong mainly to the genus *Monochamus* (Coleoptera: Cerambycidae) [5]. PWN was introduced in Japan at the beginning of the 20<sup>th</sup> century [6] and later in mainland China [7], Taiwan [8,9] and Korea [10] which caused massive mortality of native pine trees. PWN was first recorded in Europe (Portugal) in 1999 [11]; later on the Portuguese island of Madeira, 900 km SW from the European continent in 2010 [12]; and more recently in three locations in

Spain close to the Portuguese border [13]. The international spread of PWN occurs mainly through the movement of infested logs, untreated wood products and wood-packaging material. To prevent further spread and new introductions, China considers the nematode as a quarantine organism and the European and Mediterranean Plant Protection Organization has placed it on the A2 list (EPPO, <http://www.eppo.int>). A2 pests are locally present in the EPPO region, and EPPO recommends that its member countries regulate them as quarantine pests. During the 1990 s, a quarantine on green lumber exports to Europe caused an estimated annual loss to the American forest industry of US \$100 million [14].

The genus *Bursaphelenchus* currently contains nearly ninety species [15–17], which are split into 13 typological groups: namely *abietinus*, *africanus*, *cocophilus*, *eggersi*, *eremus*, *fungivorus*, *hofmanni*, *kevinii*, *leoni*, *okinawaensis*, *sexdentati*, *sinensis*, *xylophilus* and one unassigned group [17]. The *xylophilus* group contains *B. bayardi* Walia, Negi, Bajaj & Kalia, 2003; *B. conicaudatus* Kanzaki, Tsuda & Futai, 2000;

*B. doui* Braasch, Gu, Burgermeister & Zhang, 2005; *B. firmae* Kanzaki, Maehara, Aikawa & Matsumoto, 2012; *B. fraudulentus* Ruhm, 1956; *B. gillanii* Schönfeld, Braasch, Riedel & Gu, 2013; *B. koreanus* Gu, Wang & Chen, 2013; *B. luxuriosae* Kanzaki & Futai, 2003; *B. masseyi* Tomalak, Worrall & Filipiak, 2013; *B. mucronatus kolyomensis* (Korentchenko, 1980) Braasch, Gu, Burgermeister, 2011; *B. mucronatus mucronatus* (Mamiya & Enda, 1979) Braasch, Gu, Burgermeister, 2011; *B. paraluxuriosae* Gu, Wang, Braasch, Burgermeister & Schroder, 2012; *B. populi* Tomalak & Filipiak, 2011; *B. singaporensis* Gu, Zhang, Braasch & Burgermeister, 2005; *B. tryphophloeii* Tomalak & Filipiak, 2011 and *B. xylophilus* [15–20]. Identification of these species using traditional morphology requires a high level of expertise [15–17] and can be very time-consuming and inconclusive. However, rapid and accurate identification of PWN is required in order to comply with quarantine regulations and to prevent the movement of PWN between countries. Molecular diagnosis is potentially simple, rapid, sensitive and reliable and could be used to determine with relative certainty the presence of this nematode in wood.

A number of DNA-based tests have been developed to identify PWN with high sensitivity and specificity using a variety of methods including dot-blot analysis [21]; RFLP [22]; PCR-RFLP [23–27]; RAPD [28]; PCR by species-specific primers based on internal-transcribed-spacer (ITS) regions [29–31]; intergenic spacer [32]; satellite DNA [33]; heat-shock-protein 70 [34]; DNA-topoisomerase-I gene [35]; SCAR [36]; loop-mediated isothermal amplification [37]; and real-time PCR [35,38–44]. Real-time PCR offers an advantage over conventional PCR in that it is generally more sensitive and less time-consuming without post-PCR-agarose-gel electrophoresis. Although these methods are available, none of the tests can be implemented directly in a lab without extensive genomic analysis, lab tests and evaluation on the specificity for a wide range of species.

The Nematode Assay Section of the Agronomic Division of North Carolina Department of Agriculture & Consumer Services (NCDA&CS) is a high-throughput and publicly operated lab. In fiscal year 2013, 3,934 pine-wood samples were analyzed and 233 reports were generated for USDA/APHIS/PPQ in connection with the issuing of phytosanitary certificates for exported pine-wood logs to China. The objective of this study was to characterize the DNA sequences of *Bursaphelenchus* and aphelenchids and develop and validate PWN-specific primers for a reliable, sensitive and rapid real-time PCR assay to support the certification program and diagnostic services. The specificity, sensitivity and application of the assay were demonstrated.

## Materials and Methods

### Nematode Samples

A total of 97 nematode populations with wide-ranging geographical distributions and host species associations were used to evaluate the specificity and sensitivity of this assay (Table 1). They included 45 populations of *B. xylophilus*; 36 populations of 21 other species of *Bursaphelenchus* which belong to the *abietinus*, *cocophilus*, *eggersi*, *fungivorus*, *hofmanni*, *kevinii*, *leoni*, *sexdentati*, *xylophilus* groups and one unassigned group from a total of 13 groups in the genus *Bursaphelenchus* [17]; 15 populations of *Aphelenchoides besseyi* Christie, 1942, *A. fragariae* Christie, 1942, *Aphelenchoides* sp. and *Aphelenchus avenae* Bastian, 1865; and one population of mixed nematode species. This mixed population was from a North Carolina centipede lawn and contained *Belonolaimus longicaudatus* Rau, 1958; an unidentified Dorylaimid; *Helicotylenchus* sp.; *Hemicaloosia graminis* Zeng, Ye, Tredway, Martin & Martin, 2012; *Hoplolaimus galeatus* (Cobb, 1913) Thorne, 1935; *Mesocriconema* sp.;

an unidentified Rhaditid; and *Xiphinema americanum* Cobb, 1913. Three species were included from the *xylophilus* group including *Bursaphelenchus xylophilus* from the USA (R-type = no mucro), Canada (R-type, except for 187 as M-type, with mucro), China (M-type) and Japan (R-type); *B. mucronatus kolyomensis* from Norway, Finland, Germany and France; *B. mucronatus mucronatus* from Japan; and *B. fraudulentus* from Hungary.

The PWN samples used were extracted from exported pine-wood logs, wood chips, wood-packaging materials and declining pine trees, but other species were from various sources as indicated in Table 1. USDA/APHIS/PPQ officers followed the protocol provided in their Export Program Manual ([http://www.aphis.usda.gov/import\\_export/plants/manuals/domestic/downloads/xpm.pdf](http://www.aphis.usda.gov/import_export/plants/manuals/domestic/downloads/xpm.pdf)) when inspecting and sampling PWN in pine-wood logs slated for export. The number of units to inspect was based on one of two hypergeometric tables at 95% confidence of detecting a 10% or 5% infestation with 100% efficacy, depending on the state. Two holes, up to six inches (15 cm) deep, were drilled per log at six inches (15 cm) from both ends using a 2.125-inch (5.4-cm), self-feeding-wood bit. The wood shavings from two logs were mixed together, and a minimum 200 g of wood shavings were collected as one lab sample. Samples were shipped overnight to NCDA&CS for nematode analysis. Some nematode samples were collected from Europe, North America, Central America and Asia. They were reared on cultures of the fungus *Monilinia fructicola* on potato dextrose agar plates, except for *Bursaphelenchus cocophilus* (Cobb, 1919) Baujard, 1989, which was extracted from infested hosts and killed and shipped in 95% ethanol before subsequent DNA extraction.

### Extraction of Nematodes

Each wood sample was weighed and assigned a unique lab ID number. The wood shavings for each sample were placed in a single layer inside a wire basket lined with a large, single-folded Kimwipe (37 cm×42 cm, Kimberly-Clark Professional, Neenah, WI, USA) and completely wrapped. The baskets were then placed into plastic containers (36 cm L×24 cm W×14 cm H). Tap water was added until the wood shavings were completely submerged. After incubation for 24 hours at room temperature to allow nematodes to move out [45], the wood-containing baskets were removed gently and the supernatant water was vacuumed out slowly using a H<sub>2</sub>O Pro electrical pump (#50AC110B, FM Industries, Milwaukee, WI) [45]. Then the remaining nematode suspension was left to settle for 30 minutes at a slant, approximately 45 degrees, after which additional supernatant water was vacuumed. Approximately 100 ml of the remaining nematode solution was decanted into beakers and allowed to settle for 30 minutes. The supernatant water was then vacuumed with a water-faucet-vacuum-aspirator apparatus to approximately 20 ml. No sieve was used in the nematode extraction to avoid cross contamination between samples. The sample was poured into a counting dish (7.5 cm L×3 cm W×1.5 cm H), and the nematodes present were identified and counted under a Nikon Diaphot 200 inverted microscope (Tokyo, Japan). Further species confirmation was performed with a Leica DM2500 compound microscope (Leica Microsystems Inc., Buffalo Grove, IL) with interference contrast up to 1,000× magnification.

### DNA Preparation

One to ten nematodes were transferred to a glass microscope slide (7.5 cm x 2.5 cm), squashed using a pipette tip in about 5 µl of AE buffer (10 mM Tris-Cl, 0.5 mM EDTA, pH 9.0), and then placed in a 1.5-ml microtube. AE buffer was added up to 50 µl. DNA extracts were stored at -20°C until used as PCR template.

**Table 1.** Nematode species, group in *Bursaphelenchus* and populations, gene sequenced, GenBank accession number and real-time-PCR result.

| Species (group)                                             | Sample No. | Locality                   | Host                         | SSU      | LSU      | GenBank Accession Number | mtCOI    | ITS      | Threshold Cycle (C <sub>t</sub> ) by PWN-Specific Primer/Probe | C <sub>t</sub> by Nematode-Universal Primer/Probe |
|-------------------------------------------------------------|------------|----------------------------|------------------------------|----------|----------|--------------------------|----------|----------|----------------------------------------------------------------|---------------------------------------------------|
| <i>Bursaphelenchus abietinus</i> ( <i>abietinus</i> group)  | 137        | Austria                    | <i>Abies alba</i>            | AY508011 | AY508074 | AY508074                 | AY508037 |          | 0                                                              | 23.00                                             |
| <i>B. abruptus</i> (unassigned group)                       | 136        | MD, USA                    | <i>Anthophora abrupta</i>    | AY508010 | AY508073 | AY508073                 | AY508036 |          | 0                                                              | 31.22, 29.18 <sup>a</sup>                         |
| <i>B. anatolius</i> ( <i>kevinii</i> group)                 | 170        | Turkey                     | <i>Halictus</i> sp.          | AY508025 | AY508093 | AY508093                 | AY508056 |          | 0                                                              | 24.89                                             |
| <i>B. borealis</i> ( <i>leoni</i> group)                    | 138        | Germany                    | <i>Picea abies</i>           | AY508012 | AY508075 | AY508075                 | AY508038 |          | 0                                                              | 22.41                                             |
| <i>B. cocophilus</i> ( <i>cocophilus</i> group)             | 140        | Costa Rica                 | <i>Elaeis guineensis</i>     |          | AY508076 | AY508076                 |          |          | 0                                                              | 27.07                                             |
|                                                             | 144        | Honduras                   | <i>Cocos nucifera</i>        | AY509153 | AY508077 | AY508077                 | AY508039 |          | 0                                                              | 26.31                                             |
| <i>B. eggersi</i> ( <i>eggersi</i> group)                   | 146        | Germany                    | <i>Pinus sylvestris</i>      | AY508013 | AY508078 | AY508078                 | AY508040 |          | 0                                                              | 12.48                                             |
| <i>B. fraudulenti</i> ( <i>xylophilus</i> group)            | 148        | Hungary                    | <i>Quercus</i> sp.           |          | AY508079 | AY508079                 | AY508042 |          | 0                                                              | 17.98                                             |
|                                                             | 150        | Russia                     | <i>Larix</i> sp.             | AY508014 | AY508080 | AY508080                 | AY508043 |          | 0                                                              | 22.28                                             |
|                                                             | 151        | Germany                    | <i>Picea/Pinus</i>           | AY508015 | AY508081 | AY508081                 | AY508044 |          | 0                                                              | 27.26                                             |
| <i>B. fungivorus</i> ( <i>fungivorus</i> group)             | 153        | Germany                    | Greenhouse soil              | AY508016 | AY508082 | AY508082                 | AY508045 |          | 0                                                              | 27.07                                             |
| <i>B. gerberae</i> ( <i>hofmanni</i> group)                 | 169        | Trinidad                   | <i>Cocos nucifera</i>        | AY508024 | AY508092 | AY508092                 | AY508055 | KF025320 | 0                                                              | 27.96                                             |
| <i>B. hellenicus</i> ( <i>abietinus</i> group)              | 154        | Greece                     | <i>Pinus brutia</i>          | AY508017 | AY508083 | AY508083                 | AY508046 |          | 0                                                              | 31.94<br>29.97                                    |
| <i>B. hofmanni</i> ( <i>hofmanni</i> group)                 | 155        | Germany                    | <i>Picea abies</i>           | AY508018 | AY508084 | AY508084                 | AY508047 |          | 0                                                              | 23.00                                             |
| <i>B. hylobianum</i> ( <i>abietinus</i> group)              | 160        | Russia                     | <i>Larix sibirica</i>        | AY508019 | AY508085 | AY508085                 | AY508048 |          | 0                                                              | 24.38                                             |
| <i>B. kevinii</i> ( <i>kevinii</i> group)                   | 355        | Santa Cruz Island, CA, USA | <i>Halictus farinosus</i>    |          | AY753532 | AY753532                 | AY753533 |          | 0                                                              | 24.44                                             |
|                                                             | 356        | Santa Cruz Island, CA, USA | <i>Halictus farinosus</i>    |          |          |                          | EU325687 |          | 0                                                              | 22.47                                             |
| <i>B. mucronatus kolyimensis</i> ( <i>xylophilus</i> group) | 164        | Norway                     | <i>Pinus sylvestris</i>      |          | AY508087 | AY508087                 | AY508050 |          | 0                                                              | 21.70                                             |
|                                                             | 165        | Finland                    | <i>Pinus sylvestris</i>      | AY508021 | AY508088 | AY508088                 | AY508051 | KF025329 | 0                                                              | 12.66                                             |
|                                                             | 166        | Germany                    | <i>Picea abies</i>           |          | AY508089 | AY508089                 | AY508052 |          | 0                                                              | 13.95                                             |
|                                                             | 167        | Germany                    | <i>Pinus sylvestris</i>      | AY508022 | AY508090 | AY508090                 | AY508053 |          | 0                                                              | 29.08, 29.97, 32.71                               |
|                                                             | 168        | Germany                    | <i>Picea abies</i>           | AY508023 | AY508091 | AY508091                 | AY508054 | KF025318 | 0                                                              | 24.72, 32.54, 23.04                               |
|                                                             | N7         | France                     | Wood packaging material      |          |          |                          |          |          | 0                                                              | 20.81, 22.90                                      |
| <i>B. mucronatus mucronatus</i> ( <i>xylophilus</i> group)  | 163        | Japan                      | Pine tree                    | AY508020 | AY508086 | AY508086                 | AY508049 |          | 0                                                              | 30.50                                             |
| <i>B. paracorneolus</i> ( <i>hofmanni</i> group)            | 172        | Germany                    | <i>Picea abies</i>           | AY508027 | AY508095 | AY508095                 | AY508058 |          | 0                                                              | 29.19, 32.13                                      |
| <i>B. platzeri</i> ( <i>cocophilus</i> group)               | 171        | CA, USA                    | <i>Carpophilus humeralis</i> | AY508026 | AY508094 | AY508094                 | AY508057 |          | 0                                                              | 28.16                                             |
| <i>B. poligraphi</i> ( <i>sexdentati</i> group)             | 173        | Germany                    | <i>Picea abies</i>           | AY508028 | AY508096 | AY508096                 | AY508059 |          | 0                                                              | 30.30, 27.19                                      |

Table 1. Cont.

| Species (group)                         | Sample No. | Locality           | Host                                                                        | GenBank Accession Number | SSU      | LSU      | mtCOI | ITS | Threshold Cycle (C <sub>t</sub> ) by PWN-Specific Primer/Probe | C <sub>t</sub> by Nematode-Universal Primer/Probe |
|-----------------------------------------|------------|--------------------|-----------------------------------------------------------------------------|--------------------------|----------|----------|-------|-----|----------------------------------------------------------------|---------------------------------------------------|
| <i>B. rufipennis</i> (hofmanni group)   | 727        | WI, USA            | Spruce bark beetle ( <i>Dendroctonus rufipennis</i> ) from <i>Picea</i> sp. |                          |          |          |       |     | 0                                                              | 22.17                                             |
| <i>B. seani</i> (fungivorus group)      | 174        | CA, USA            | <i>Anthophora bomboidea</i>                                                 | AY508097                 | AY508060 |          |       |     | 0                                                              | 25.25                                             |
|                                         | 175        | CA, USA            | <i>Anthophora bomboidea</i>                                                 | AY508098                 | AY508061 |          |       |     | 0                                                              | 31.47                                             |
|                                         | 176        | CA, USA            | <i>Anthophora bomboidea</i>                                                 | AY508099                 | AY508062 |          |       |     | 0                                                              | 24.7                                              |
| <i>B. sexdentati</i> (sexdentati group) | 177        | Greece             | <i>Pinus nigra</i>                                                          | AY508100                 | AY508063 |          |       |     | 0                                                              | 25.35 31.46                                       |
|                                         | 178        | Greece             | <i>Pinus nigra</i>                                                          | AY508101                 | AY508064 |          |       |     | 0                                                              | 24.87                                             |
|                                         | 179        | Greece             | <i>Pinus radiata</i>                                                        | AY508102                 | AY508065 |          |       |     | 0                                                              | 23.93                                             |
|                                         | 180        | Italy              | <i>Pinus pinaster</i>                                                       | AY508103                 | AY508066 |          |       |     | 0                                                              | 29.08                                             |
| <i>B. tusciae</i> (eggersi group)       | 183        | Italy              | <i>Pinus pinea</i>                                                          | AY508104                 | AY508067 |          |       |     | 0                                                              | 27.68                                             |
| <i>B. xylophilus</i> (xylophilus group) | 185        | Canada             | <i>Pinus banksiana</i>                                                      | AY508105                 | AY508068 | KF025325 |       |     | 15.98                                                          | 16.36                                             |
|                                         | 186        | Japan              | <i>Pinus densiflora</i>                                                     | AY508106                 | AY508069 | KF025326 |       |     | 10.14, 13.37                                                   | 15.18                                             |
|                                         | 187        | NB, Canada         | Pine tree                                                                   | AY508107                 | AY508070 | KF025327 |       |     | 10.53, 8.69, 12.02                                             | 12.80                                             |
|                                         | 188        | QC, Canada         | <i>Pinus/Picea</i>                                                          | AY508108                 | AY508071 | KF025328 |       |     | 10.27                                                          | 14.97                                             |
|                                         | 345        | MO, USA            | <i>Pinus sylvestris</i>                                                     |                          |          | KF025324 |       |     | 24.62                                                          | 29.18                                             |
|                                         | N18        | China              | <i>Pinus kesiya</i>                                                         |                          |          |          |       |     | 27.86, 27.93                                                   | 28.73, 25.16                                      |
|                                         | 2008-00610 | USA                | Pine tree                                                                   |                          |          |          |       |     | 30.94                                                          | 32.94                                             |
|                                         | 2008-01182 | Swansboro, NC, USA | Pine tree                                                                   |                          |          | KF025321 |       |     | 24.34                                                          | 32.94, 24.76                                      |
|                                         | 2008-12108 | USA                | Wood chips                                                                  |                          |          | KF025323 |       |     | 28.61, 28.30                                                   | 27.16, 27.51, 26.95                               |
|                                         | 2008-12140 | USA                | Wood chips                                                                  |                          |          | KF025321 |       |     | 24.86, 26.81                                                   | 26.19                                             |
|                                         | 2008-26471 | USA                | Wood chips                                                                  |                          |          | KF025323 |       |     | 24.91, 30.85                                                   | 28.95                                             |
|                                         | 2008-26479 | USA                | Wood chips                                                                  |                          |          | KF025321 |       |     | 24.95                                                          | 28.3                                              |
|                                         | 2008-26522 | USA                | Wood chips                                                                  |                          |          | KF025321 |       |     | 25.56, 26.62, 23.06                                            | 26.61, 24.59                                      |
|                                         | 2009-00185 | USA                | Wood chips                                                                  |                          |          | KF025321 |       |     | 22.57                                                          | 23.27                                             |
|                                         | 2009-00211 | USA                | Wood chips                                                                  |                          |          | KF025321 |       |     | 30.21                                                          | 27.99                                             |

Table 1. Cont.

| Species (group) | Sample No. | Locality                | Host                                            | GenBank Accession Number |     |          | Threshold Cycle (C <sub>t</sub> ) by PWN-Specific Primer/Probe | C <sub>t</sub> by Nematode-Universal Primer/Probe |
|-----------------|------------|-------------------------|-------------------------------------------------|--------------------------|-----|----------|----------------------------------------------------------------|---------------------------------------------------|
|                 |            |                         |                                                 | SSU                      | LSU | mtCOI    |                                                                |                                                   |
|                 | 2009-00251 | USA                     | Wood chips                                      |                          |     | KF025321 | 20.40, 20.96                                                   | 21.00                                             |
|                 | 2009-00740 | USA                     | Pine tree                                       |                          |     | KF025321 | 21.91, 22.54, 23.55                                            | 22.28                                             |
|                 | 2009-01010 | USA                     | Wood chips                                      |                          |     | KF025321 | 28.81                                                          | 23.58                                             |
|                 | 2009-01042 | Beaufort, NC, USA       | Pine tree                                       |                          |     | KF025321 | 21.24, 28.56                                                   | 22.77                                             |
|                 | 2009-12070 | USA                     | Wood chips                                      |                          |     | KF025321 | 24.56                                                          | 27.43                                             |
|                 | 2009-23917 | USA                     | Pine tree                                       |                          |     | KF025321 | 22.33                                                          | 25.05                                             |
|                 | 2010-00489 | Beaufort, NC, USA       | Japanese black pine ( <i>Pinus thunbergii</i> ) |                          |     | KF025321 | 24.83, 25.61                                                   | 31.98                                             |
|                 | 2010-00695 | Wilmington, NC, USA     | Japanese black pine ( <i>Pinus thunbergii</i> ) | KF025317                 |     | KF025321 | 24.14                                                          | 24.56                                             |
|                 | 2012-05740 | Emerald Isle, NC, USA   | Japanese black pine ( <i>Pinus thunbergii</i> ) |                          |     | KF025321 | 20.86, 22.88                                                   | 22.40                                             |
|                 | 2012-08812 | Seven Spring, NC, USA   | Pine-wood log                                   |                          |     | KF025321 | 28.81                                                          | 22.87                                             |
|                 | 2012-19124 | Atlantic Beach, NC, USA | Japanese black pine ( <i>Pinus thunbergii</i> ) |                          |     | KF025330 | 20.86, 21.91, 22.04, 23.58, 23.95, 25.97                       | 23.26, 23.96, 24.95, 25.80                        |
|                 | 2012-33423 | USA                     | Pine-wood log                                   |                          |     | KF025321 | 24.22, 26.61                                                   | 26.63, 31.32                                      |
|                 | 2012-33666 | USA                     | Pine-wood log                                   |                          |     | KF025323 | 24.21                                                          | 24.58                                             |
|                 | 2012-34017 | USA                     | Pine-wood log                                   |                          |     | KF025323 | 28.00                                                          | 22.67                                             |
|                 | 2013-00850 | USA                     | Pine-wood log                                   |                          |     | KF025323 | 24.49                                                          | 22.82                                             |
|                 | 2013-00930 | USA                     | Pine-wood log                                   | KF025319                 |     | KF025321 | 21.96                                                          | 21.49                                             |
|                 | 2013-02091 | USA                     | Pine-wood log                                   |                          |     | KF025321 | 22.84                                                          | 22.58                                             |
|                 | 2013-02478 | USA                     | Pine-wood log                                   |                          |     | KF025321 | 29.96                                                          | 26.18                                             |
|                 | 2013-03266 | USA                     | Pine-wood log                                   |                          |     | KF025321 | 30.40                                                          | 30.19                                             |

Table 1. Cont.

| Species (group)                 | Sample No. | Locality               | Host                                            | GenBank Accession Number |          |          | Threshold Cycle (C <sub>t</sub> ) by PWN-Specific Primer/Probe | C <sub>t</sub> by Nematode-Universal Primer/Probe |
|---------------------------------|------------|------------------------|-------------------------------------------------|--------------------------|----------|----------|----------------------------------------------------------------|---------------------------------------------------|
|                                 |            |                        |                                                 | SSU                      | LSU      | mtCOI    |                                                                |                                                   |
|                                 | 2013-04587 | USA                    | Pine-wood log                                   |                          |          | KF025323 | 28.53                                                          | 30.71                                             |
|                                 | 2013-09254 | Onslow County, NC, USA | Japanese black pine ( <i>Pinus thunbergii</i> ) |                          |          | KF025323 | 22.60, 23.86, 23.98                                            | 25.96, 26.37, 30.91                               |
|                                 | 2013-33795 | USA                    | Pine-wood log ( <i>Pinus strobes</i> )          |                          |          |          | 28.74, 28.93, 29.89                                            | 29.81                                             |
|                                 | 2013-34160 | USA                    | Pine-wood log                                   |                          |          |          | 23.91, 25.04, 28.94                                            | 23.34                                             |
|                                 | 2013-34252 | USA                    | Pine-wood log                                   |                          |          |          | 27.77                                                          | 28.64                                             |
|                                 | 2013-34362 | USA                    | Pine-wood log                                   |                          |          |          | 27.39                                                          | 27.86                                             |
|                                 | 2013-34252 | USA                    | Pine-wood log                                   |                          |          |          | b                                                              | b                                                 |
|                                 | 2013-34362 | USA                    | Pine-wood log                                   |                          |          |          | b                                                              | b                                                 |
|                                 | 2013-34693 | USA                    | Pine-wood log                                   |                          |          |          | b                                                              | b                                                 |
|                                 | 2013-34814 | USA                    | Pine-wood log                                   |                          |          |          | b                                                              | b                                                 |
|                                 | 2013-34973 | USA                    | Pine-wood log ( <i>Pinus strobes</i> )          |                          |          |          | b                                                              | b                                                 |
| <i>Aphelenchoides besseyi</i>   | 98         | FL, USA                | Strawberry ( <i>Fragaria ananassa</i> )         | AY508035                 | AY508109 | AY508072 | 0                                                              | 23.77, 30.44                                      |
| <i>Aphelenchoides fragariae</i> | 2010-02011 | Raleigh, NC, USA       | Ornamental plant                                |                          |          |          | 0                                                              | 22.39                                             |
|                                 | 2010-02016 | Raleigh, NC, USA       | Ornamental plant                                |                          |          |          | 0                                                              | 21.65                                             |
|                                 | 2012-08056 | Raleigh, NC, USA       | Fern ( <i>Woodsia obtusa</i> )                  |                          |          |          | 0                                                              | 27.91, 29.14                                      |
|                                 | M112       | Raleigh, NC, USA       | Lantana                                         |                          |          |          | 0                                                              | 31.67                                             |
| <i>Aphelenchoides</i> sp.       | 757        | NC, USA                | Soil around pine tree                           |                          |          |          | 0                                                              | 22.04, 30.18                                      |
|                                 | 2008-01707 | USA                    | Pine tree                                       |                          |          |          | 0                                                              | 27.83                                             |
|                                 | 2010-00129 | Crane, IN, USA         | Pine-wood-packaging material                    |                          |          |          | 0                                                              | 22.37                                             |
|                                 | 12-6370    | Crane, IN, USA         | Pine-wood-packaging material                    | KF032031                 | KF032032 | KF032031 | 0                                                              | 29.19                                             |





**Table 2.** PCR Primers and Real-Time PCR Primers and Probes.

| No. | Primer              | Gene  | Direction <sup>a</sup> | Sequence                                                 |
|-----|---------------------|-------|------------------------|----------------------------------------------------------|
| 1   | B18S1F <sup>b</sup> | SSU   | F                      | ATACGCATGTCTAAGTGGAG                                     |
| 2   | B18S570F            | SSU   | F                      | AAGTCTGGTGCCAGCAGCC                                      |
| 3   | B18S750F            | SSU   | F                      | GCAGGATTACTTTGAACGGCTC                                   |
| 4   | B18S750R            | SSU   | R                      | GAGCCGTTCAAAGTAATCCTG                                    |
| 5   | B18S930F            | SSU   | F                      | AATTCGTGGACCGTAGCGAG                                     |
| 6   | B18S930R            | SSU   | R                      | CTCGCTACGGTCCACGAATT                                     |
| 7   | B18S1000F           | SSU   | F                      | GTCAGAGGTTCAAGGCG                                        |
| 8   | B18S1000R           | SSU   | R                      | CGCCTTCGAACCTCTGAC                                       |
| 9   | B18S1300F           | SSU   | F                      | GCATGGCCGTTCTTAGTTCGT                                    |
| 10  | B18S1480F           | SSU   | F                      | GGCCGCACGCGTGCTACAAT                                     |
| 11  | B18S1480R           | SSU   | R                      | ATTGTAGCACGCGTGCGGCC                                     |
| 12  | B18S1820R           | SSU   | R                      | CTACGGCTACCTTGTTACGAC                                    |
| 13  | BITSF               | ITS   | F                      | ATCGCAGTGGCTTGAACCGG                                     |
| 14  | B58SF               | ITS   | F                      | AATCGCAGTGAATTGCGATA                                     |
| 15  | B58SR1              | ITS   | R                      | CTCATAATATCTGTAATTCGTAC                                  |
| 16  | B58SR2              | ITS   | R                      | AACACACCTGAATC                                           |
| 17  | BITS2R              | ITS   | R                      | TCCTCTGCTTACTGATATGC                                     |
| 18  | BCOIF               | mtCOI | F                      | GGTGGTTTTGGTAATTG                                        |
| 19  | BCOIR               | mtCOI | R                      | ACAACCAATTAACCAAT                                        |
| 20  | Ne18SF              | SSU   | F                      | ATTGACGGAAGGGCACCAC                                      |
| 21  | Ne18SP              | SSU   | F                      | 5' – /5HEX/TGCGGCTTA/ZEN/ATTTGACTCAACACGGG/3IABkFQ/ – 3' |
| 22  | Ne18SR              | SSU   | R                      | GAACGCCATGCACCAC                                         |
| 23  | BxITSF              | ITS1  | F                      | GATGGCGGTTTCGATTGCGG                                     |
| 24  | BxITSP              | ITS1  | R                      | FAM AACTCAACAACAGCACGTAGA MGBNFQ                         |
| 25  | BxITSR              | ITS1  | R                      | TGGCTGGTCTCATCTGTCGG                                     |

<sup>a</sup>: F: forward, R: reverse. <sup>b</sup>: number after 18S represents the relative primer position in rDNA SSU gene.  
doi:10.1371/journal.pone.0078804.t002

forward primer, 18 µl of 100-µM reverse primer, 5 µl of 100-µM probe and 159 µl of 1× TE buffer.

The second nematode-universal primer/probe set (Ne18SF, Ne18SP and Ne18SR) was designed based on the conserved sites of SSU from a multiple alignment of 54 species of nematodes in the genera *Anguina*, *Aphelenchoides*, *Aphelenchus*, *Ascaris*, *Bursaphelenchus*, *Caenorhabditis*, *Cephalobus*, *Cryptaphelenchus*, *Ditylenchus*, *Ektaphelenchus*, *Globodera*, *Howardula*, *Laimaphelenchus*, *Longidorus*, *Meloidogyne*, *Myolaimus*, *Pristionchus*, *Ruehmaphelenchus*, *Schistonchus* and *Seinura* as an internal positive control. The double-quenched probe Ne18SP is labeled with a different dye HEX (536-nm maximum emission) to allow for duplex-real-time PCR. Real-time PCR SciTool (PrimeQuest and OligoAnalyzer) by Integrated DNA Technologies, Inc. (Coralville, IA, USA) (<http://www.idtdna.com/Scitools/Applications/RealTimePCR/>) was used for primer and probe design. The primers amplify a 142-bp region of ribosomal DNA SSU for a variety of nematode species. These primers and probe were synthesized by Integrated DNA Technologies, Inc. and prepared in 10× working solution.

The 10-µl real-time PCR contained 5 µl of 2× TaqMan® real-time PCR master mixes (Life Technologies), 1 µl of 10× primer and probe mix, 3-µl water and 1-µl-DNA template. This provides for 900 nM of each primer and 250 nM of the probe at the final 1× concentration. A two-step, thermal-cycling program was used: denaturation at 95°C for 10 min, followed by 40 cycles of denaturation at 95°C for 15 s, annealing and extension at 60°C for 1 min in Applied Biosystems® 7500 Real-Time PCR Systems (Life Technologies).

The 10-µl real-time PCR contained 5 µl of 2× TaqMan® real-time PCR master mixes (Life Technologies), 1 µl of 10× primer and probe mix, 3-µl water and 1-µl-DNA template. This provides for 900 nM of each primer and 250 nM of the probe at the final 1× concentration. A two-step, thermal-cycling program was used: denaturation at 95°C for 10 min, followed by 40 cycles of denaturation at 95°C for 15 s, annealing and extension at 60°C for 1 min in Applied Biosystems® 7500 Real-Time PCR Systems (Life Technologies).

DQ841162 Bm GATGTGGGTTTCGATTTCG--TCGTCCCCGCTACTGATTGTTGCGACGGAAGCCGAGAGGTGACCGTGCAAC  
EU259322 Bx GATGGCGGTTTCGATTTCGCGTCGTTCCGCCTACTGATGGTTGCGATGGAAGCCGAGAGGCGACCGTGCAAC  
BxITSF

DQ841162 Bm GGTAAGTCTGGGTTTCTATGCGCTGC-GTTGAGTCGACGTTTTACCGTGTGACAGATGAGACCAGCCA  
EU259322 Bx GGTAAGTCTGGGTTTCTACGTGCTGTTGTTGAGTTGGCGTTTTACCGTGCCGACAGATGAGACCAGCCA  
BxITSP BxITSR

**Figure 2. Primer (BxITSF, BxITSR) and probe (BxITSP) design based on the multiple alignment of ITS1 DNA sequences of *Bursaphelenchus* species.** Data only show two representative species, *B. xylophilus* (EU259322) and *B. mucronatus* (DQ841162).  
doi:10.1371/journal.pone.0078804.g002



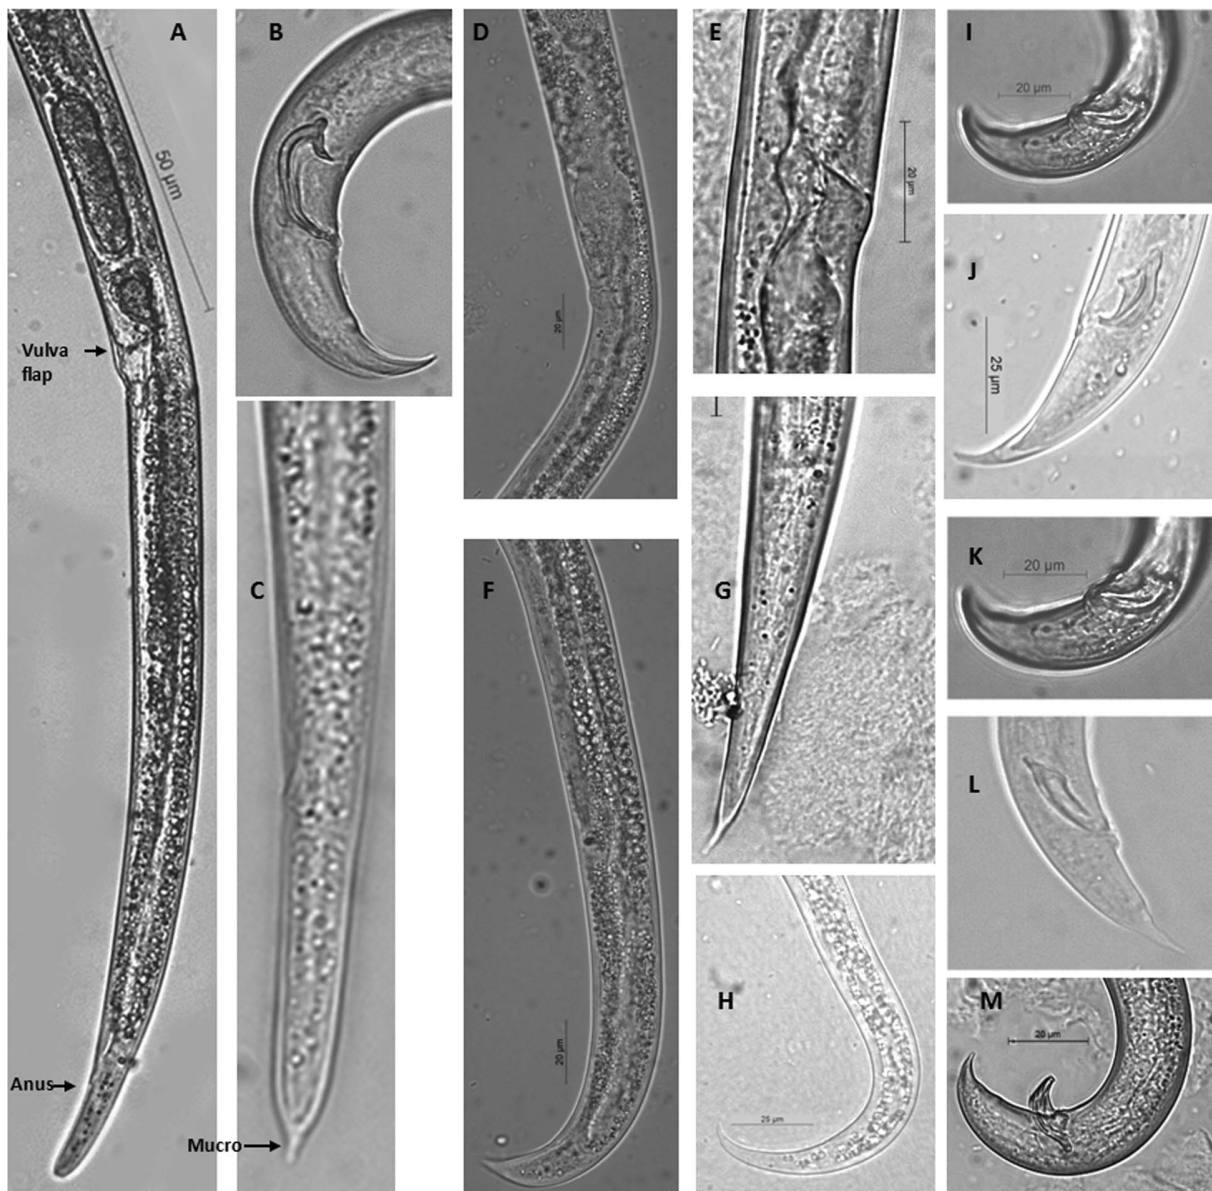

**Figure 3. Morphological comparisons between *Bursaphelenchus xylophilus* (A-C) and other wood-inhabiting aphelenchids (D-M).** A. Posterior female end showing vulva flap, anus and blunt tail. B. Male spicule and tail end. C. Female tail showing mucro. D-E. Vulva without flap. F-H. Female pointed tail. I-M. Spicule and tail end of male.

doi:10.1371/journal.pone.0078804.g003

One sample (2013–33795) with three life stages (single female, single male and single juvenile) in separate tubes was prepared in 50- $\mu$ l AE buffer, and a 5-, 10- and 20-fold dilution was prepared and tested for the sensitivity of the real-time PCR assay by PWN-specific primer and probe mix.

#### Duplex-Real-time PCR

The real-time PCR contained 5  $\mu$ l of 2 $\times$  TaqMan<sup>®</sup> real-time PCR master mixes, 1  $\mu$ l of 10 $\times$ -PWN-specific primer and probe mix, 1  $\mu$ l of 10 $\times$  nematode-universal primer and probe mix, 2- $\mu$ l water and 1- $\mu$ l-DNA template. The same two-step, thermal-cycling program was used.

## Results and Discussion

### Morphological Identification of PWN

PWN is a gonochoristic species that can be typologically characterized by the presence of a vulva flap and broad tail with rounded tip in the female, and large, arcuate spicules in the male that are trapezoidal in lateral view, with a sharply pointed prominent rostrum and cucullus (disc-like projection) at the distal ends. Other characters and measurements are available from the original description by Mamiya & Kiyohara [5] and EPPO diagnostic standard [45]. A quick guide for distinguishing PWN from other wood-inhabiting aphelenchids is presented in Fig. 3. Typological species identification is not so challenging for wood logs and products for export from the USA because none of the

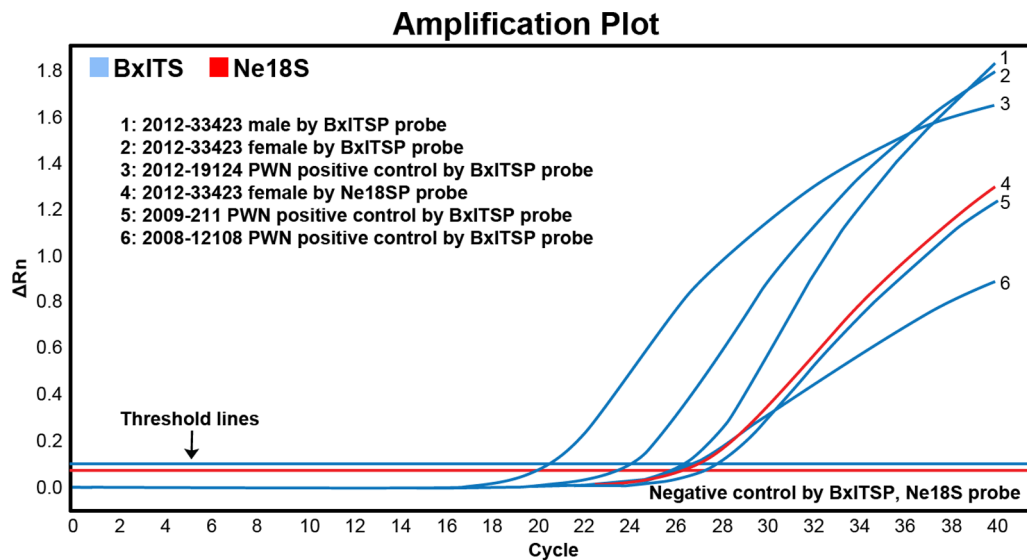

**Figure 4. Example of a real-time-PCR result for testing sample 2013–33423 by PWN-specific- and nematode-universal- primer/probes.**

doi:10.1371/journal.pone.0078804.g004

other closely related species in the *xylophilus* group are known to be present in the USA.

### DNA Sequencing

The ribosomal DNA SSU, LSU D2/D3, ITS and mitochondrial-DNA COI were sequenced, and their accession numbers from GenBank are presented in Table 1. Some of data were collected from our previous study [47]. Sequencing analysis revealed PWN has unique sequences in all these markers and is closest to its sister species *B. mucronatus*. Molecular phylogenetic relationships of *Bursaphelenchus* species are available in Ye et al. [47] and Kanzaki et al. [20]. The multiple sequence alignment revealed the protein-coding-gene mtCOI has no insertion/

deletions, but only site variations, except for *B. cocophilus* with a 3-bp deletion. SSU and LSU D2/D3 have few insertions/deletions and some site variations, and ITS is the most variable with considerable insertions/deletions and site variations. Therefore, ITS1 was chosen as the real-time-PCR marker to ensure the specificity. The primer/probe design based on the variable sites is shown in Fig. 2.

### Real-time PCR

Using the PWN-specific-primer/probe set, all assays were 100% specific and accurate for the detection of PWN with a FAM threshold cycle ( $C_t$  value) from 8.69–30.94. No fluorescent signals were obtained for samples other than PWN. The

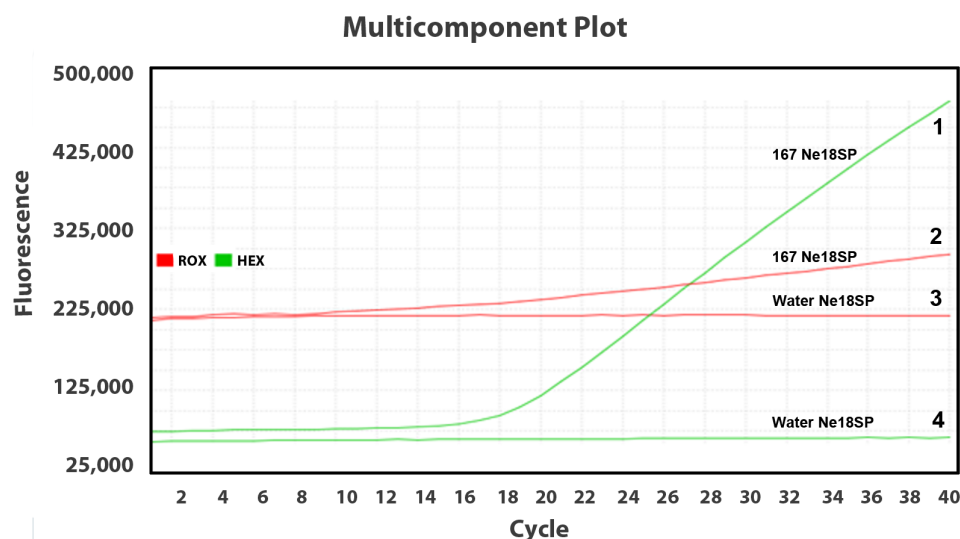

**Figure 5. Multi-component plot of a real-time-PCR result.** This plot shows increased reference dye ROX (Curve 2) and non-increased ROX (Curve 3), increased reporting dye HEX (Curve 1) and non-increased HEX (Curve 4) for *Bursaphelenchus mucronatus* (sample 167, Curves 1 and 2) and negative control (Curves 3 and 4).

doi:10.1371/journal.pone.0078804.g005

**Table 3.** Real-time PCR results for nematode sample no. 2013–33795 with different life stages and dilutions.

| Life stage | Dilution |       |       |       |
|------------|----------|-------|-------|-------|
|            | 1×       | 1/5×  | 1/10× | 1/20× |
| 1 female   | 28.93    | 29.34 | 32.83 | 32.40 |
| 1 male     | 29.89    | 33.28 | 33.24 | 33.99 |
| 1 juvenile | 28.74    | 30.40 | 29.63 | 31.06 |

doi:10.1371/journal.pone.0078804.t003

nematode-universal primer/probe set showed all PWN samples and all other non-PWN samples to be positive for the presence of nematode SSU with HEX  $C_t$  from 12.48–32.99 (Table 1). This nematode-universal marker also works for a number of mixed species from the soil nematode sample (2013–33843) from a centipede lawn. Fig. 4 is the amplification plot of an example assay to test sample 2012–33423. In this assay, samples 2008–12108, 2009–00211 and 2012–19124, which were previously identified as PWN, were used as positive controls. Water was used as the negative control. This assay revealed the single female and single male of 2012–33423 were positive using PWN-specific primer/probe, and the single female was positive using the nematode-universal primer/probe. The fact that all three positive controls were positive and the negative control was negative demonstrates that the reactions were successful and valid. If a sample tested PWN-negative, it then should be nematode-positive to be considered a valid assay. If it tested nematode-negative, the nematode DNA preparation and/or real-time PCR should be repeated. In any assay, the multi-component plot was examined to ensure the reaction was set up correctly and the reaction mix had not evaporated during the approximately 90-minute-long-PCR amplification.

Fig. 5 is an example of a test showing one sample 167 (curves 1 and 2) and negative control (curves 3 and 4) using the nematode-universal primer/probe. The starting fluorescence of ROX in red (curves 2 and 3) were close to each other at *ca* 220,000, and the starting fluorescence of HEX in green (curves 1 and 4) was *ca*

74,000. This revealed the pipetting for adding 2× TaqMan® real-time PCR master mixes containing background-dye ROX and adding primer/probe containing reporting-dye HEX was approximately even. At the end of the amplification at cycle 40, the ROX (curve 2) on sample 167 had increased to 250,000, indicating evaporation in the reaction tube due to problems with the cap seal. The ROX (curve 3) on the negative control remained the same, demonstrating that no evaporation occurred. The reporting-dye HEX (curve 1) on sample 167 increased considerably to 475,000, indicating a positive result. Lack of amplification in the negative control as indicated by the HEX (curve 4) corroborates the validity of the test. In this assay, although the reaction tube of sample 167 was not completely enclosed, the amplification of a positive result was still considered successful and valid, and the fluorescent signal of HEX could be normalized automatically by the reference to the ROX dye in the amplification plot. In any test, the multi-component plot should be reviewed and all ROX curves in a test should be without an increase ideally, and any test with odd results should be repeated.

The use of the PWN-specific primer/probe with real-time PCR yielded similar results regardless of the life stages used (Table 3). The test could detect a single nematode with a tiny amount of nematode DNA, demonstrated by testing 1/5, 1/10 and 1/20× dilutions, but the dilution extended the  $C_t$  value up to three cycles when diluted to 1/20× (Fig. 6, Table 3). This result revealed the real-time PCR is highly sensitive, i.e., it can detect a 1-μl nematode template even if a single nematode was squashed and dissolved in 1,000 μl of buffer. This highly diluted DNA template is sufficient to run many molecular tests and replicates. In a real-world application, a single nematode would always be available for preparation in 50 μl buffer or even up to 1,000 μl buffer for real-time-PCR assay.

#### Duplex-Real-time PCR

Duplex-real-time PCR was performed on a subset of samples including 12 nematode species and 15 populations of PWN from a single nematode (female, male or juvenile) up to 20 nematodes (Table 4). All samples were positive regardless of the nematode species with the internal-positive-control marker using the nematode-universal primer/probe, but only positive for PWN

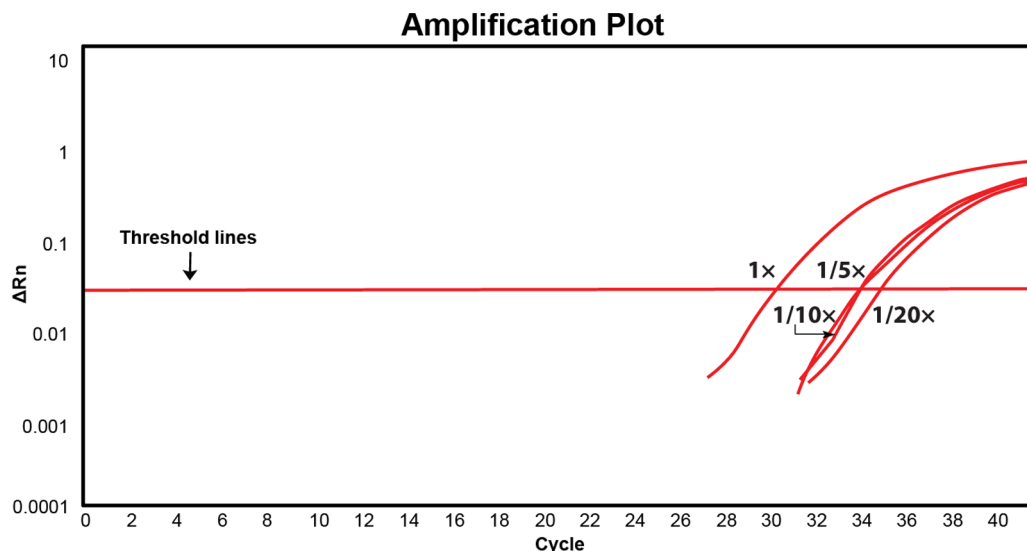**Figure 6.** Amplification plot of a real-time-PCR result with different dilutions of a male of *Bursaphelenchus xylophilus* (2013–33795). doi:10.1371/journal.pone.0078804.g006

**Table 4.** Nematode duplex real-time PCR results.

| Species                         | Sample No. | Number of Nematode and Life Stage | Threshold Cycle (C <sub>t</sub> ) by PWN-Specific Primer/Probe | C <sub>t</sub> by Nematode-Universal Primer/Probe |
|---------------------------------|------------|-----------------------------------|----------------------------------------------------------------|---------------------------------------------------|
| <i>Bursaphelenchus abruptus</i> | 136        | 10 nematodes                      | 0                                                              | 31.23                                             |
| <i>B. anatolius</i>             | 170        | 10 nematodes                      | 0                                                              | 27.83                                             |
| <i>B. fraudulentus</i>          | 150        | 10 nematodes                      | 0                                                              | 26.47                                             |
| <i>B. gerberae</i>              | 169        | 10 nematodes                      | 0                                                              | 30.44                                             |
| <i>B. hylobianum</i>            | 160        | 10 nematodes                      | 0                                                              | 27.33                                             |
| <i>B. mucronatus</i>            | 163        | 1 female                          | 0                                                              | 31.60                                             |
|                                 | 167        | 1 female                          | 0                                                              | 31.64                                             |
|                                 | 168        | 1 female                          | 0                                                              | 27.16                                             |
| <i>B. paracorneolus</i>         | 172        | 10 nematodes                      | 0                                                              | 30.12                                             |
| <i>B. tusciae</i>               | 183        | 10 nematodes                      | 0                                                              | 30.00                                             |
| <i>B. xylophilus</i>            | 345        | 1 male                            | 31.99                                                          | 29.44                                             |
|                                 | 2009-00251 | 10 nematodes                      | 23.90                                                          | 23.09                                             |
|                                 | 2009-00740 | 10 nematodes                      | 23.06                                                          | 22.98                                             |
|                                 | 2010-00489 | 5 nematodes                       | 26.06                                                          | 26.23                                             |
|                                 | 2009-01010 | 6 nematodes                       | 32.33                                                          | 32.16                                             |
|                                 | 2012-19124 | 1 juvenile                        | 26.25                                                          | 26.35                                             |
|                                 |            | 10 nematodes                      | 24.28                                                          | 24.96                                             |
|                                 | 2012-33423 | 1 female                          | 29.95                                                          | 26.79                                             |
|                                 | 2013-09254 | 20 nematodes                      | 27.64                                                          | 26.66                                             |
|                                 | 2013-33795 | 1 male                            | 30.45                                                          | 31.04                                             |
|                                 | 2013-33795 | 7 nematodes                       | 25.02                                                          | 25.55                                             |
|                                 | 2013-34160 | 3 nematodes                       | 23.91                                                          | 23.34                                             |
|                                 | 2013-34252 | 2 nematodes                       | 27.84                                                          | 25.57                                             |
|                                 | 2013-34362 | 7 nematodes                       | 26.92                                                          | 24.95                                             |
|                                 | 2013-34693 | 10 nematodes                      | 25.94                                                          | 25.23                                             |
|                                 |            |                                   | 22.99                                                          | 22.18                                             |
|                                 | 2013-34814 | 1 female                          | 30.74                                                          | 27.91                                             |
|                                 | 2013-34973 | 6 nematodes                       | 26.43                                                          | 25.08                                             |
| <i>Aphelenchoides besseyi</i>   | 98         | 10 nematodes                      | 0                                                              | 30.37                                             |
| <i>Aphelenchoides</i> sp.       | 2013-34187 | 1 female                          | 0                                                              | 28.96                                             |
|                                 | 2013-34814 | 1 female                          | 0                                                              | 28.68                                             |
| Mixed species                   | 2014-33843 | Many nematodes                    | 0                                                              | 26.13                                             |

doi:10.1371/journal.pone.0078804.t004

samples using the PWN-specific primer/probe (Table 4). A positive amplification in duplex-real-time PCR is represented by two sigmoid curves (PWN dye and nematode dye) in the amplification plot (Fig. 7A) and two sigmoid curves (PWN dye and nematode dye) and no increase in the ROX curve (Fig. 7B) in a multi-component plot. A negative amplification in duplex-real-time PCR is represented by one sigmoid curve (nematode dye) as an internal-positive control, but no amplification in PWN dye in the amplification plot (Fig. 7C) and one sigmoid curve (nematode dye), no increase in the ROX curve and no increase in the PWN curve (Fig. 7D) in the multi-component plot. This duplex PCR further confirmed that the assay is sensitive to any stage of nematode and is sensitive to a single nematode. In a few cases, even in a negative control, a later amplification was observed with C<sub>t</sub> greater than 35 (Fig. 7E), but the amplification of the reporting dye was not strong (Fig. 7F). This false-positive result is probably due to primer-dimer formation and/or degradations of the probe.

In conclusion, this study characterized DNA sequences on ribosomal DNA LSU, SSU D2/D3, ITS and mtCOI on a wide range of species in *Bursaphelenchus* and other aphelenchids. Universal primers were developed to perform DNA sequencing on this group of nematodes. Through extensive DNA analysis of these genes, ITS1 was chosen as the marker to develop PWN-real-time PCR. All assays were highly robust and specific for detection of PWN and sensitive for a single nematode regardless of the life stage. This real-time-PCR assay has been successfully applied in export and diagnostic assay services in a high-throughput-nematode-assay lab. One nematode prepared in 50 µl of DNA template provided sufficient material for molecular diagnosis. It is extremely sensitive even when a single nematode was prepared in 1,000 µl of buffer, which allowed numerous replications and long-term storage in the freezer for future confirmation and reference. Compared with other real-time-PCR applications [35,38–44], this assay tested more species in *Bursaphelenchus* which include many representative species in nine groups from a total of 13 groups in

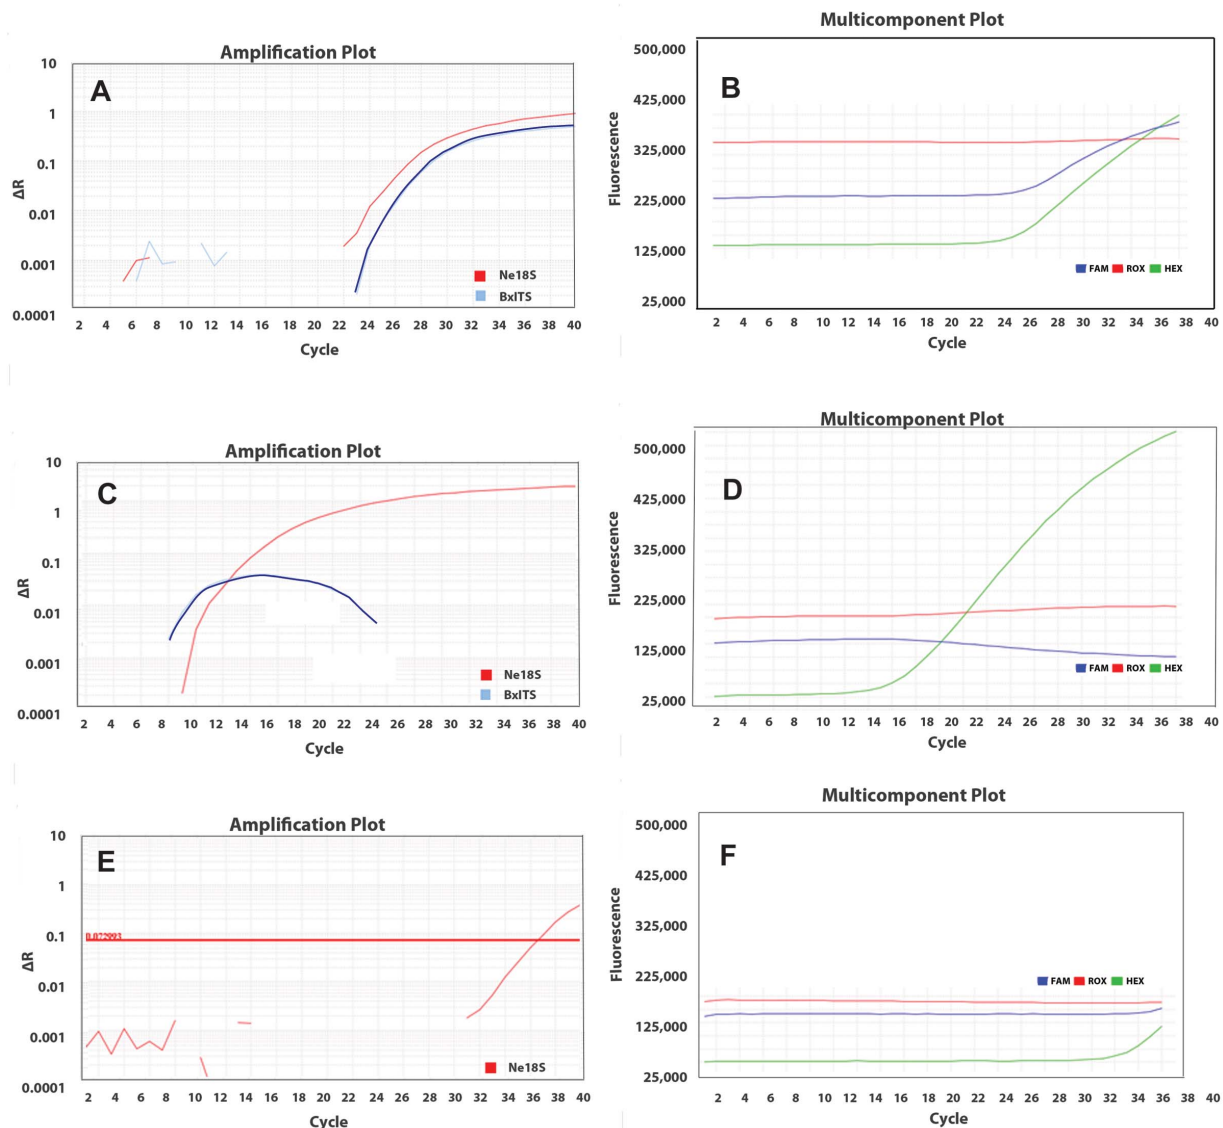

**Figure 7. Duplex real-time-PCR result.** A. A positive result with two sigmoid FAM and HEX curves in amplification plot. B. A positive result with two sigmoid FAM and HEX curves and non-increased ROX in multi-component plot. C. A negative result with one sigmoid HEX curve, and non-increased FAM curve and non-increased ROX in multi-component plot. D. A negative result with one sigmoid HEX curve, and non-increased FAM curve and non-increased ROX in multi-component plot. E. A false-positive result with a slightly later-increased HEX curve ( $C_t > 35$ ) in amplification plot. F. A false-negative result with a slightly later-increased HEX curve ( $C_t > 35$ ) and non-increased FAM and ROX curves in multi-component plot. doi:10.1371/journal.pone.0078804.g007

the genus *Bursaphelenchus*, and more populations of PWN, especially American populations where the nematode originated, and other aphelenchid species. Both PWN-specific and nematode-universal-primer/probe sets using different fluorescent dyes were developed, and the test could be implemented through either simplex- or duplex-real-time PCR. The nematode-universal-primer/probe set for real-time-PCR amplification was included as a nematode endogenous control to detect the presence of nematode-ribosomal-SSU gene, so that a PWN-negative sample can still be evaluated to exclude false negatives due to instrument, pipetting, reagent, and/or reaction failure. In addition, many of the real-time-PCR results were further confirmed by DNA

sequencing with GenBank accession numbers (Table 1). This real-time-PCR assay is rapid (<3 h) and therefore ensures a short turnaround time for phytosanitary certification. If a sample of any of these tests is negative for PWN, this study provided a PCR and DNA sequencing approach on ribosomal DNA SSU, LSU D2/D3, ITS and mtCOI genes to help determine the species.

### Author Contributions

Conceived and designed the experiments: WY RMGD. Performed the experiments: WY. Analyzed the data: WY. Contributed reagents/materials/analysis tools: WY RMGD. Wrote the paper: WY RMGD.

## References

- Steiner G, Bührer EM (1934) *Aphelenchoides xylophilus* n. sp. a nematode associated with bluestain and other fungi in timber. J Agric Res 48: 949–951.
- Dwinell LD (1993) First record of pinewood nematode (*Bursaphelenchus xylophilus*) in Mexico. Plant Dis 77: 846.
- Knowles K, Beaubien Y, Wingfield MJ, Bark FA, French DW (1983) The pinewood nematode new in Canada. For Chron 559: 40.
- Kiyohara T, Tokushige Y (1971) Inoculation experiments of a nematode *Bursaphelenchus* sp. onto pine trees. J Jap For Soc 53: 210–218.
- Mamiya Y, Kiyohara T (1972) Description of *Bursaphelenchus lignicolus* n. sp. (Nematoda: Aphelenchoididae) from pine wood and histopathology of nematode infested trees. Nematologica 18: 120–124.
- Yano M (1913) Investigations on the cause of pine mortality in Nagasaki prefecture. Sanrin-Koho 4: 1–14.
- Cheng H, Lin M, Li W, Fang Z (1983) The occurrence of a pine wilting disease caused by a nematode found in Nanjing. For Pest and Dis 4: 1–5.
- Chang RJ, Lu SS (1996) Investigation of the occurrence of pine wilt disease and its naturally infected hosts in Fushan Botanical Garden. Taiwan J For Sci 11: 201–207.
- Tzean SS, Yen JH, Chang RJ (1997) Pine wood nematode. Taiwan For Res Inst 42 pp.
- Yi C, Byun B, Park J, Yang S, Chang K (1989) First finding of the pine wood nematode, *Bursaphelenchus xylophilus* (Steiner & Bührer) Nickle and its insect vector in Korea. Res Rep For Res Inst Seoul 38: 141–149.
- Mota MM, Braasch H, Bravo MA, Penas AC, Burgermeister W, et al. (1999) First report of *Bursaphelenchus xylophilus* in Portugal and in Europe. Nematology 1: 727–734.
- Fonseca L, Cardoso JMS, Lopes A, Pestana M, Abreu F, et al. (2012) The pinewood nematode, *Bursaphelenchus xylophilus*, in Madeira Island. Helminthologia 49: 96–103.
- Robertson L, Cobacho Arcos S, Escuer M, Santiago Merino R, Esparrago G, et al. (2011) Incidence of the pinewood nematode *Bursaphelenchus xylophilus* Steiner & Bührer, 1934 (Nematoda: Aphelenchoididae) in Spain. Nematology 13: 655–757.
- Dwinell LD (1997) The pinewood nematode: Regulation and mitigation. Annu Rev Phytopathol 35: 153–166.
- Ryss A, Vieira P, Mota M, Kulnisch O (2005) A synopsis of the genus *Bursaphelenchus* Fuchs, 1937 (Aphelenchida: Parasitaphelenchidae) with keys to species. Nematology 7: 393–458.
- Hunt DJ (2008) A checklist of the Aphelenchoidea (Nematoda: Tylenchina). J Nematode Morphol Syst 10: 99–135.
- Braasch H, Burgermeister W, Gu J (2009) Revised intra-generic grouping of *Bursaphelenchus* Fuchs, 1937 (Nematoda: Aphelenchoididae). J Nematode Morphol and Syst 12: 65–88.
- Braasch H (2008) The enlargement of the *xylophilus* group in the genus *Bursaphelenchus*. In Mota MM, Vieira P, editors. Pine wilt disease: A worldwide threat to forest ecosystems. Netherlands: Springer. 139–149.
- Braasch H, Gu J, Burgermeister W (2011) *Bursaphelenchus mucronatus kolymensis* comb. n. – new definition of the “European type” of *B. mucronatus*. J Nematode Morphol Syst 14: 77–90.
- Kanzaki N, Machara N, Aikawa T, Matsumoto K (2012). *Bursaphelenchus firmiae* n. sp. (Nematoda: Aphelenchoididae), isolated from *Monochamus grandis* Waterhouse that emerged from dead firs, *Abies firma* Sieb. et Zucc. Nematology 14: 395–404.
- Webster JM, Anderson RV, Baillie DL, Beckenbach K, Curran J, et al. (1990) DNA probes for differentiating isolates of the pinewood nematode species complex. Rev Nematol 13: 255–263.
- Abad P, Tares S, Brugier N, Deguiran G (1991) Characterisation of the relationships in the pinewood nematode species complex (PWNSC) (*Bursaphelenchus* spp.) using a heterologous unc-22 DNA probe from *Caenorhabditis elegans*. Parasitology 102: 303–308.
- Braasch H, Metge K, Burgermeister W (1999) *Bursaphelenchus* species (Nematoda, Parasitaphelenchidae) found in coniferous trees in Germany and their ITS-RFLP patterns. Nachr Dtsch Pflanzenschutzdienst 51: 312–320.
- Burgermeister W, Metge K, Braasch H, Buchbach E (2005) ITS RFLP patterns for differentiation of 26 *Bursaphelenchus* species (Nematoda: Parasitaphelenchidae) and observations on their distribution. Russ J Nematol 13: 29–42.
- Burgermeister W, Braasch H, Metge K, Gu J, Schröder T, et al. (2009) ITS-RFLP analysis, an efficient tool for identification of *Bursaphelenchus* species. Nematology 11: 649–668.
- Hoyer U, Burgermeister W, Braasch H (1998) Identification of *Bursaphelenchus* species (Nematoda, Aphelenchoididae) on the basis of amplified ribosomal DNA (ITS-RFLP). Nachr Dtsch Pflanzenschutzdienst 50: 273–277.
- Iwahori H, Tsuda K, Kanzaki N, Izui K, Futai K (1998) PCR-RFLP and sequencing analysis of ribosomal DNA of *Bursaphelenchus* nematodes related to pine wilt disease. Fundam Appl Nematol 21: 655–666.
- Braasch H, Burgermeister W, Pastrik KH (1995) Differentiation of three *Bursaphelenchus* species by means of RAPD PCR. Nachr Dtsch Pflanzenschutzdienst 47: 310–314.
- Jiang LQ, Zheng JW, Waeyenberge L, Subbotin SA, Moens M (2005) Duplex PCR based identification of *Bursaphelenchus xylophilus* (Steiner & Bührer, 1934) Nickle, 1970. Russ J Nematol 13: 115–121.
- Matsunaga K, Togashi K (2004) A simple method for discriminating *Bursaphelenchus xylophilus* and *B. mucronatus* by species-specific polymerase chain reaction primer pairs. Nematology 6: 273–277.
- Zhuo K, Cui RQ, Liao JL (2011) A multiplex one-step PCR method for the simultaneous identification of *Bursaphelenchus xylophilus*, *B. mucronatus* and *B. doui* - three species within the *xylophilus* group. For Pathol 41: 66–69.
- Kang JS, Choi KS, Chin SC, Moon IS, Lee SG, et al. (2004) Development of an efficient PCR-based diagnosis protocol for the identification of the pinewood nematode, *Bursaphelenchus xylophilus* (Nematoda: Aphelenchoididae). Nematology 6: 279–285.
- Castagnone C, Abad P, Castagnone-Sereno P (2005) Satellite DNA-based species-specific identification of single individuals of the pinewood nematode *Bursaphelenchus xylophilus* (Nematoda: Aphelenchoididae). Eur J Plant Pathol 112: 191–193.
- Leal I, Green M, Allen EA, Humble LM, Rott M (2005) An effective PCR-based diagnostic method for the detection of *Bursaphelenchus xylophilus* (Nematoda: Aphelenchoididae) in wood samples from lodgepole pine. Nematology 7: 833–842.
- Huang L, Ye JR, Wu XQ, Xu XL, Sheng JM, et al. (2010) Detection of the pine wood nematode using a real-time PCR assay to target the DNA topoisomerase I gene. Eur J Plant Pathol 127: 89–98.
- Chen FM, Negi S, Ye JR (2011) A SCAR molecular marker to distinguish *Bursaphelenchus mucronatus* from the pinewood nematode, *B. xylophilus*. For Pathol 41: 376–381.
- Kikuchi T, Aikawa T, Oeda Y, Karim N, Kanzaki N (2009) A rapid and precise diagnostic method for detecting the pinewood nematode *Bursaphelenchus xylophilus* by loop-mediated isothermal amplification. Phytopathology 99: 1365–1369.
- Cao AX, Liu XZ, Zhu SF, Lu BS (2005) Detection of the pinewood nematode, *Bursaphelenchus xylophilus*, using a real-time polymerase chain reaction assay. Phytopathology 95: 566–571.
- Francois C, Castagnone C, Boonham N, Tomlinson J, Lawson R, et al. (2007) Satellite DNA as a target for TaqMan real-time PCR detection of the pinewood nematode, *Bursaphelenchus xylophilus*. Mol Plant Pathol 8: 803–809.
- Kang JS, Moon S II, Lee SG, Shin SC, Lee SH (2009) Rapid and accurate prediction of the frequencies of *Bursaphelenchus xylophilus* and *B. mucronatus* in mixed nematode samples using real-time species-specific PCR. Nematology 11: 289–299.
- Leal I, Foord B, Allen E, Campion C, Rott M, et al. (2013) Development of two reverse transcription-PCR methods to detect living pinewood nematode, *Bursaphelenchus xylophilus*, in wood. For Pathol 43: 104–114.
- Leal I, Green M, Allen E, Humble L, Rott M (2007) Application of a real-time PCR method for the detection of pine wood nematode, *Bursaphelenchus xylophilus*, in wood samples from lodgepole pine. Nematology 9: 351–362.
- Takeuchi Y, Futai K (2009) Diagnosis and quantification of the pine wood nematode, *Bursaphelenchus xylophilus* (Steiner & Bührer), in wood of *Pinus thunbergii* with real-time PCR. Nematol Res 39: 9–16.
- Wang JC, Ji L, Yang XL, Ma YG, Lin MS (2006) Diagnosis of pine wood nematode, *Bursaphelenchus xylophilus*, by real-time fluorescent PCR using TaqMan probe. Acta Phytopathol Sinica 36: 281–284.
- Anonymous (2013) Diagnostics: PM 7/4 (3): *Bursaphelenchus xylophilus*. EPPO Bull 43: 105–118.
- Nunn GB (1992) Nematode molecular evolution. Ph.D. dissertation. University of Nottingham, U.K.
- Ye W, Giblin-Davis RM, Braasch B, Morris M, Thomas WK (2007) Phylogenetic relationships among *Bursaphelenchus* species (Nematoda: Parasitaphelenchidae) inferred from nuclear ribosomal and mitochondrial DNA sequence data. Mol Phylogenet Evol 43: 1185–1197.
